# Supplementary material
Source: publisher site journal article supplement (https://www.dovepress.com/article/370212)
Supplement: Supplementary file 1 [file get_supplementary_file.php]

**Supplementary content**

Supplementary Figure 1: Kaplan Meier curves depicting recurrence-free survival analysis of 6 subgroups

Supplementary Figure 2: Kaplan Meier curves depicting recurrence-free survival analysis of solitary lesions

Supplementary Table 1: Summary of recurrence-free survival analysis results of 6 subgroups

Supplementary Table 2: Summary of recurrence-free survival analysis results of solitary lesions stratified by size.

Supplementary Figure 1: Kaplan Meier curves depicting recurrence-free survival analysis of 6 subgroups


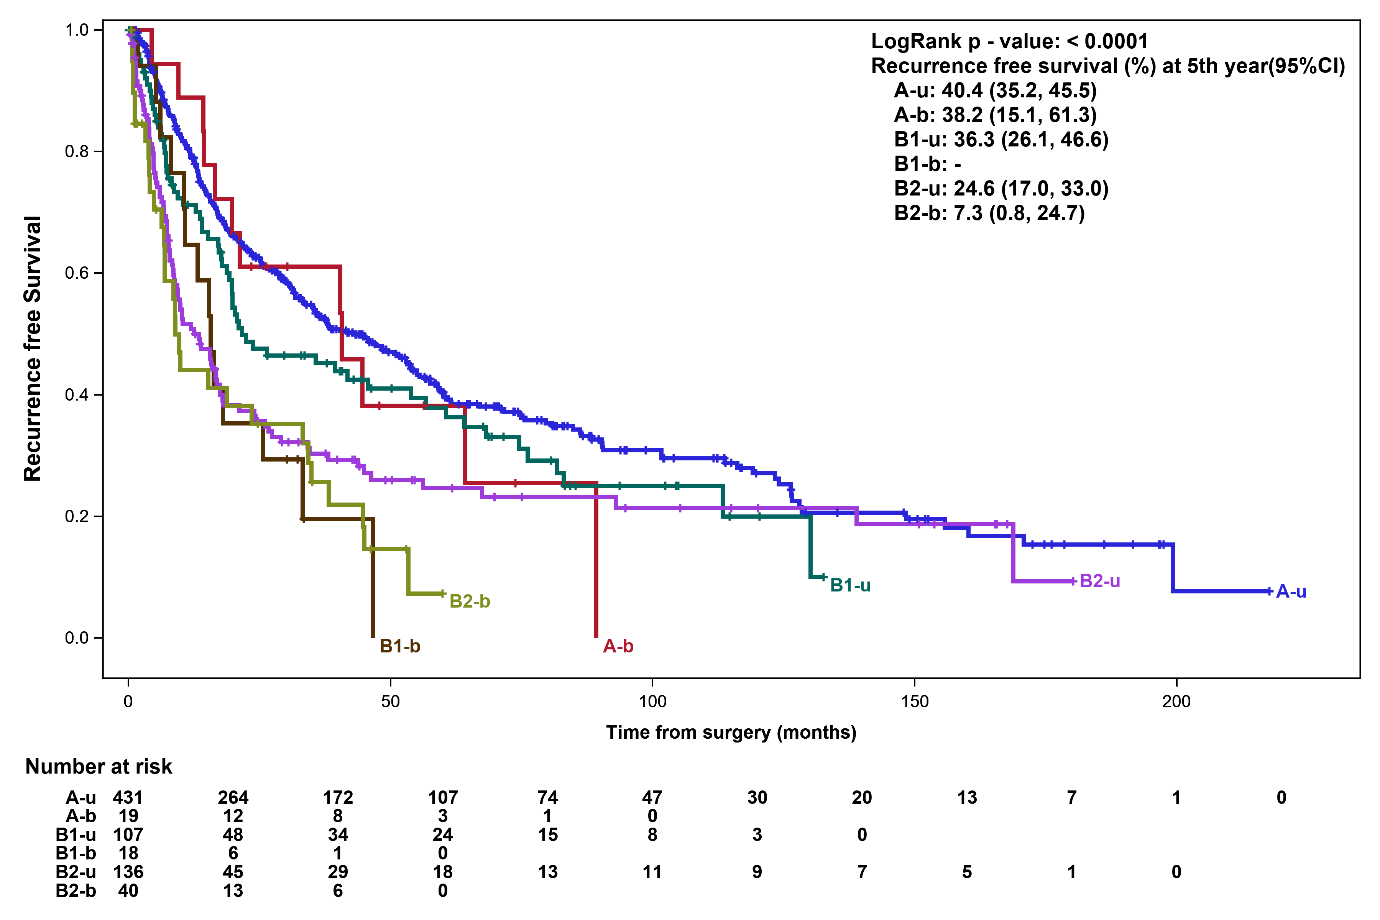


Supplementary Figure 2: Kaplan Meier curves depicting recurrence-free survival analysis of solitary lesions


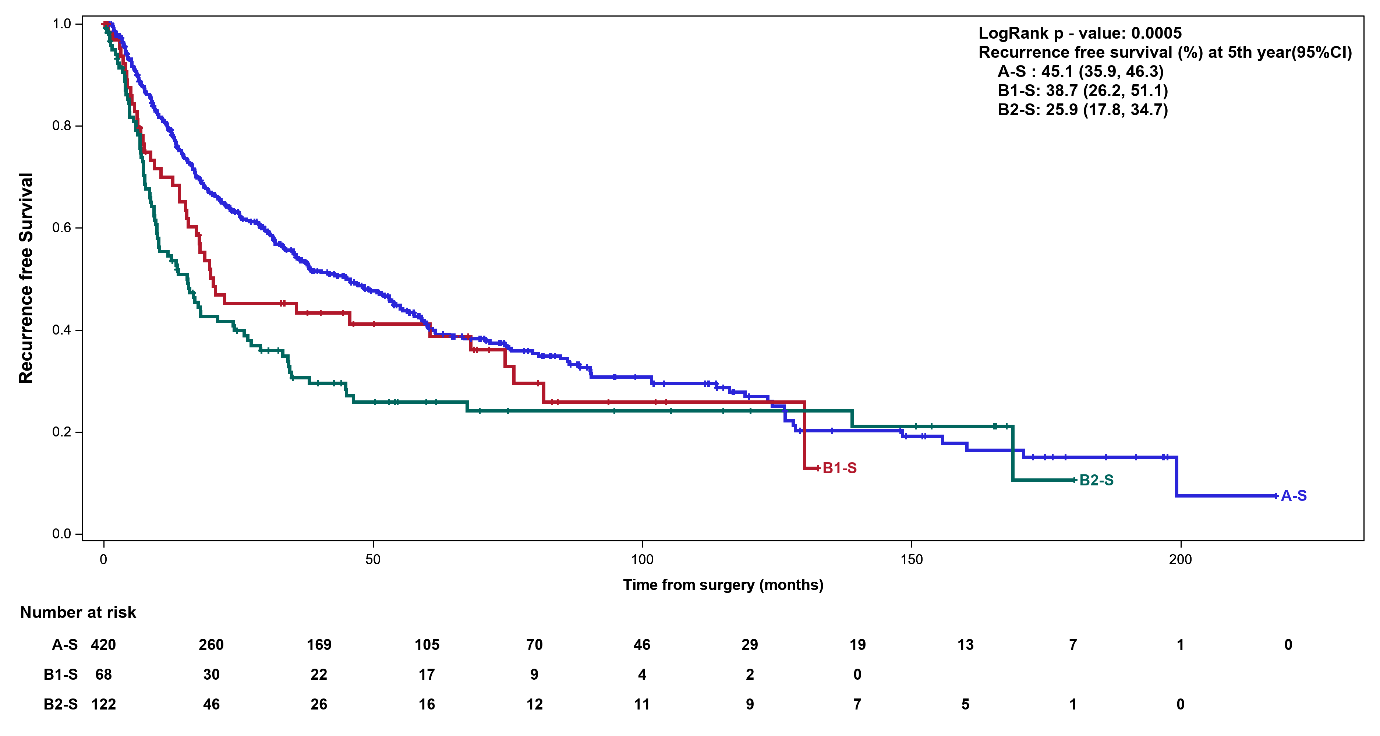


Supplementary Table 1: Summary of recurrence-free survival analysis results

| **Group** | **HCC stage, location** | **BCLC stage** | **5 Years recurrence free rate (%)**  **(95% CI)** | **Median recurrence free time (months)**  **(95% CI)** | **P Value**  **(Log rank)** |
| --- | --- | --- | --- | --- | --- |
| A-u | Milan Unilobar | BCLC A | 40.4 (35.2, 45.5) | 42.81 (33.77, 53.68) | < 0.0001 |
| A-b | Milan Bilobar | BCLCA | 38.2 (15.1, 61.3) | 40.67 (16.49, 89.20) |  |
| B1-u | Out of Milan Within Upto7 Unilobar | BCLC B1 | 36.3 (26.1, 46.6) | 21.65 (18.73, 53.88) |  |
| B1-b | Out of Milan Within Upto7 Bilobar | BCLC B1 | NE | 15.64 (8.05, 33.22) |  |
| B2-u | Out of Milan Out of Upto7 Unilobar | BCLC B2 | 24.6 (17.0, 33.0) | 13.37 (8.71, 17.51) |  |
| B2-b | Out of Milan Out of Upto7 Bilobar | BCLC B2 | 7.3 (0.8, 24.7) | 8.90 (6.31, 33.22) |  |

Note: NE, Not estimable; CI, confidence interval; HCC, hepatocellular carcinoma; BCLC, Barcelona clinic liver cancer staging system.

Supplementary Table 2: Summary of recurrence-free survival analysis results of solitary lesions stratified by size.

| **Group** | **Solitary lesions stratified by size** | **5 Years survival rate (%)**  **(95% CI)** | **Median survival time (months)**  **(95% CI)** | **P Value**  **(Log rank)** |
| --- | --- | --- | --- | --- |
| A-S | Within Milan | 45.1 (35.9, 46.3) | 45.73 (35.35, 53.85) | 0.0005 |
| B1-S | Out of Milan Within Upto7 | 38.7 (26.2, 51.1) | 20.27 (15.38, 68.14) |  |
| B2-S | Out of Milan Out of Upto7 | 25.9 (17.8, 34.7) | 15.57 (9.86, 23.98) |  |
